# Supplementary material for: Charge transfer doping with an organic layer to achieve a high-performance p-type WSe2 transistor
Source: Royal Society of Chemistry journal article supplement (doi:10.1039/d1tc01780b), 2021-01-01
Supplement: d1tc01780b1.pdf [file d1tc01780b1.pdf]

**Electronic Supplementary Information (ESI) for**

**Charge transfer doping with an organic layer to  
achieve a high-performance p-type WSe<sub>2</sub> transistor**

Minho Yoon,<sup>1</sup> and Jiyoul Lee <sup>1,2\*</sup>

<sup>1</sup> Department of Smart Green Technology Engineering, Pukyong National University, Busan, 48547, Korea.

<sup>2</sup> Department of Nanotechnology Engineering, Pukyong National University, Busan, 48547, Korea.

\* E-mail: [jiyoul\\_lee@pknu.ac.kr](mailto:jiyoul_lee@pknu.ac.kr) (J. Lee)

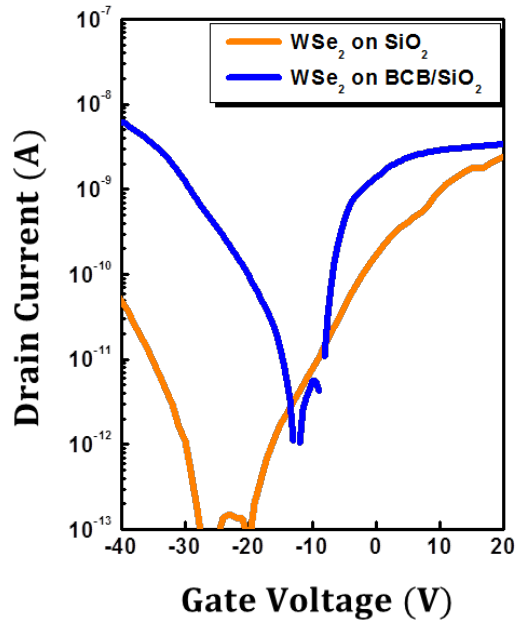

Fig. S1. Transfer characteristics of WSe<sub>2</sub> transistors with (blue) and without (orange) a BCB layer.

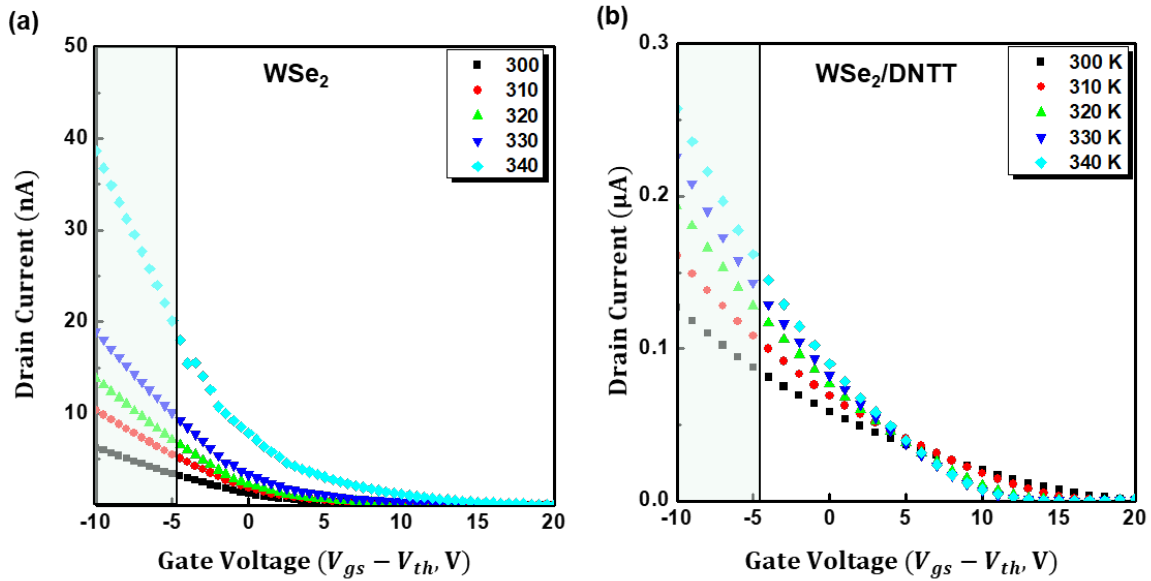

Fig. S2. Extraction of field-effect mobility of the (a) WSe<sub>2</sub> FET and (b) WSe<sub>2</sub>/DNNT FET. After extracting the threshold voltages of the devices, the transfer characteristics of the devices are retraced as a function of the gate overdrive voltage ( $V_{gs} - V_{th}$ ). The field-effect mobility is estimated from the slopes within the  $-5$  to  $-10$  V overdrive voltage range.
